# Supplementary material for: Genetic and Morphological Characterization of the Invasive Corbicula Lineages in European Russia
Source: MDPI journal article supplement (doi:10.3390/w15183226), 2023-09-11
Supplement: s1 [file s1]

Supporting Information, Table S5. The shell elongation index across the four *Corbicula* morphotypes. Kruskal-Wallis test (statistic/p value:  $H(\chi^2) = 60.73$ ;  $p = <0.0001$ . Significant pairwise comparisons following Bonferroni correction.

| Morphotype | “Int”  | S      | Rlc    | R     |
|------------|--------|--------|--------|-------|
| “Int”      |        | 0.0001 | 0.8    | 0.001 |
| S          | 0.0001 |        | 0.0001 | 0.003 |
| Rlc        | 0.8    | 0.0001 |        | 0.14  |
| R          | 0.01   | 0.003  | 0.1    |       |
