# Supplementary material for: Genetic and Morphological Characterization of the Invasive Corbicula Lineages in European Russia
Source: MDPI journal article supplement (doi:10.3390/w15183226), 2023-09-11
Supplement: s1 [file s1]

Table S2. Information on newly sequenced specimens of *Corbicula* spp. from European Russia. Materials are from the collection of the Russian Museum of Biodiversity Hotspots (RMBH), N. Laverov Federal Center for Integrated Arctic Research of the Ural Branch of the Russian Academy of Sciences (Arkhangelsk, Russia)

| Species              | COI acc. no. | 28S acc. no. | Specimen voucher | Locality                                  |
|----------------------|--------------|--------------|------------------|-------------------------------------------|
| <i>C. fluminea</i>   | OR252880     | n/a          | MCorb18          | Myanmar, Koklu River                      |
|                      | OR252881     | n/a          | MCorb18_2        |                                           |
|                      | OR252882     | n/a          | MCorb19          |                                           |
|                      | OR252883     | n/a          | MCorb19_2        |                                           |
| <i>C. fluminea</i>   | OR252884     | n/a          | MCorb23_1        | Malaysia, Perak River                     |
|                      | OR252885     | n/a          | MCorb23_2        |                                           |
|                      | OR252886     | n/a          | MCorb24_2        |                                           |
| <i>C. fluminalis</i> | OR252887     | n/a          | MCorb26          | Tajikistan                                |
| <i>C. fluminalis</i> | OR252888     | OR252261     | MCorb31_1        | Turkey, Karasu River, Orontes River basin |
|                      | OR252889     | OR252262     | MCorb31_2        |                                           |
|                      | OR252890     | OR252263     | MCorb31_3        |                                           |
|                      | OR252891     | OR252264     | MCorb31_4        |                                           |
|                      | OR252892     | OR252265     | MCorb32_1        |                                           |
|                      | OR252893     | OR252266     | MCorb32_2        |                                           |
|                      | OR252894     | OR252267     | MCorb32_3        |                                           |
|                      | OR252895     | OR252268     | MCorb32_4        |                                           |
| <i>C. fluminea</i>   | OR252896     | OR252269     | MCorb37_1        | Canada, Kawakawa Lake                     |
|                      | OR252897     | OR252270     | MCorb37_2        |                                           |
|                      | OR252898     | OR252271     | MCorb38_1        |                                           |
|                      | OR252899     | OR252272     | MCorb38_2        |                                           |
|                      | OR252900     | OR252273     | MCorb38_3        |                                           |
| <i>C. fluminea</i>   | OR252901     | n/a          | MCorb39          | USA, Chehalis River                       |
|                      | OR252902     | n/a          | MCorb40          |                                           |
| <i>C. fluminea</i>   | OR252903     | OR252274     | MCorb42          | Canada, Pit Lake                          |
|                      | OR252904     | OR252275     | MCorb43          |                                           |
| <i>C. fluminalis</i> | OR252905     | n/a          | MCorb57          | Myanmar, Sittaung River                   |
|                      | OR252906     | n/a          | MCorb57_2        |                                           |
|                      | OR252907     | n/a          | MCorb57_3        |                                           |
| <i>C. fluminea</i>   | OR252908     | n/a          | MCorb58_4        | Myanmar, Bilin River                      |
| <i>C. fluminea</i>   | OR252909     | n/a          | MCorb59          | Myanmar, Irrawaddy River                  |
|                      | OR252910     | n/a          | MCorb59_2        |                                           |
| <i>C. fluminea</i>   | OR252911     | n/a          | MCorb61          | Myanmar, Sin Khong stream                 |
|                      | OR252912     | n/a          | MCorb61_2        |                                           |
| <i>C. fluminea</i>   | OR252913     | n/a          | MCorb63          | Myanmar                                   |
| <i>C. fluminea</i>   | OR252914     | n/a          | MCorb64          | Myanmar, stream near the Kawkareik town   |
|                      | OR252915     | n/a          | MCorb65          | Myanmar, Myitnge River                    |
| <i>C. fluminalis</i> | OR252916     | n/a          | MCorb68          | Myanmar, ox-bow lake                      |
| <i>C. fluminalis</i> | OR252917     | n/a          | MCorb70          | Myanmar, Bago River                       |
| <i>C. fluminea</i>   | OR252918     | n/a          | MCorb74_1        | Italy, Maggiore Lake                      |
|                      | OR252919     | n/a          | MCorb74_2        |                                           |

|                      |          |          |            |                               |
|----------------------|----------|----------|------------|-------------------------------|
|                      | OR252920 | n/a      | MCorb74_3  |                               |
|                      | OR252921 | n/a      | MCorb75_1  |                               |
|                      | OR252922 | n/a      | MCorb75_2  |                               |
|                      | OR252923 | n/a      | MCorb75_3  |                               |
| <i>C. leana</i>      | OR252924 | n/a      | MCorb76_1  | Italy, irrigation canal       |
|                      | OR252925 | n/a      | MCorb76_2  |                               |
|                      | OR252926 | n/a      | MCorb76_3  |                               |
|                      | OR252927 | n/a      | MCorb77_1  |                               |
| <i>C. leana</i>      | OR252928 | n/a      | MCorb78_1  | India, Ganges River           |
|                      | OR252929 | n/a      | MCorb78_2  |                               |
|                      | OR252930 | n/a      | MCorb79_1  |                               |
|                      | OR252931 | n/a      | MCorb79_2  |                               |
|                      | OR252932 | n/a      | MCorb79_3  |                               |
|                      | OR252933 | n/a      | MCorb79_4  |                               |
|                      | OR252934 | n/a      | MCorb79_5  |                               |
| <i>C. fluminalis</i> | OR252935 | n/a      | MCorb86_1  | Myanmar, Indaw Lake           |
|                      | OR252936 | n/a      | MCorb86_2  |                               |
|                      | OR252937 | n/a      | MCorb86_3  |                               |
| <i>C. fluminea</i>   | OR252938 | n/a      | MCorb87_2  | Myanmar, Myaung Stream        |
| <i>C. fluminalis</i> | OR252939 | n/a      | MCorb88_1  | Myanmar, Indaw River          |
|                      | OR252940 | n/a      | MCorb88_2  |                               |
| <i>C. fluminalis</i> | OR252941 | n/a      | MCorb89_1  | Myanmar, Toung Up River       |
|                      | OR252942 | n/a      | MCorb89_2  |                               |
|                      | OR252943 | n/a      | MCorb89_3  |                               |
|                      | OR252944 | n/a      | MCorb89_4  |                               |
|                      | OR252945 | n/a      | MCorb89_5  |                               |
| <i>C. fluminea</i>   | OR252946 | n/a      | MCorb91_1  | Myanmar, Nga Wun River        |
|                      | OR252947 | n/a      | MCorb91_2  |                               |
|                      | OR252948 | n/a      | MCorb91_3  |                               |
|                      | OR252949 | n/a      | MCorb91_4  |                               |
| <i>C. fluminea</i>   | OR252950 | OR252276 | MCorb94    | Moldova, Prut River           |
|                      | OR252951 | n/a      | MCorb95    |                               |
| <i>C. leana</i>      | OR252952 | n/a      | MCorb98_1  | Laos, Nam Kadan               |
| <i>C. fluminea</i>   | OR252953 | n/a      | MCorb98_2  |                               |
|                      | OR252954 | n/a      | MCorb98_3  |                               |
| <i>C. fluminea</i>   | OR252955 | n/a      | MCorb99_1  | Laos, Nam Sanam               |
|                      | OR252956 | n/a      | MCorb99_2  |                               |
|                      | OR252957 | n/a      | MCorb99_3  |                               |
| <i>C. fluminalis</i> | OR252958 | n/a      | MCorb104_1 | Myanmar, Nantyin Stream       |
| <i>C. leana</i>      | OR252959 | n/a      | MCorb104_2 |                               |
|                      | OR252960 | n/a      | MCorb104_3 |                               |
| <i>C. leana</i>      | OR252961 | n/a      | MCorb105_1 | Myanmar, Lashio River         |
|                      | OR252962 | n/a      | MCorb105_2 |                               |
|                      | OR252963 | n/a      | MCorb105_3 |                               |
|                      | OR252964 | n/a      | MCorb106_1 |                               |
|                      | OR252965 | n/a      | MCorb106_2 |                               |
|                      | OR252966 | n/a      | MCorb106_3 |                               |
| <i>C. fluminalis</i> | OR252967 | n/a      | MCorb107   | Myanmar, Ba Mawe Khong Stream |

|                      |          |                                    |            |                                                                     |
|----------------------|----------|------------------------------------|------------|---------------------------------------------------------------------|
| <i>C. leana</i>      | OR252968 | n/a                                | MCorb108   | Myanmar, Mole Stream                                                |
|                      | OR252969 | n/a                                | MCorb109_1 | Myanmar, Winyaw River                                               |
|                      | OR252970 | n/a                                | MCorb109_2 |                                                                     |
|                      | OR252971 | n/a                                | MCorb109_3 |                                                                     |
|                      | OR252972 | n/a                                | MCorb109_4 |                                                                     |
| <i>C. fluminalis</i> | OR252973 | n/a                                | MCorb110_1 | Myanmar, Bayo River                                                 |
|                      | OR252974 | n/a                                | MCorb110_2 |                                                                     |
| <i>C. fluminea</i>   | OR252975 | n/a                                | MCorb111_2 | Myanmar, Ha Htin Bi Lin Stream                                      |
| <i>C. fluminalis</i> | OR252976 | n/a                                | MCorb111_3 |                                                                     |
| <i>C. fluminalis</i> | OR252977 | n/a                                | MCorb112_1 | Myanmar, Nan Ma Tee River                                           |
| <i>C. fluminea</i>   | OR252978 | OR252277                           | MCorb131_1 | Russia, Kostroma Oblast, cooling pond of the Kostroma Power Station |
|                      | OR252979 | OR252278                           | MCorb131_2 |                                                                     |
|                      | OR252980 | OR252279                           | MCorb131_3 |                                                                     |
|                      | OR252981 | OR252280                           | MCorb131_4 |                                                                     |
|                      | OR252982 | OR252281                           | MCorb131_5 |                                                                     |
| <i>C. fluminea</i>   | OR252983 | OR252282                           | MCorb132_1 | Russia, Rostov Oblast, Don River                                    |
|                      | OR252984 | OR252283                           | MCorb132_2 |                                                                     |
|                      | OR252985 | OR252284                           | MCorb132_3 |                                                                     |
| <i>C. fluminea</i>   | OR252986 | OR252285                           | MCorb133_1 | Russia, Rostov Oblast, canal of the Novocherkasskaya Power Station  |
|                      | OR252987 | OR252286                           | MCorb133_2 |                                                                     |
|                      | OR252988 | OR252287                           | MCorb133_3 |                                                                     |
|                      | OR252989 | OR252288                           | MCorb133_4 |                                                                     |
| <i>C. fluminea</i>   | OR252990 | OR252289                           | MCorb134_1 | Russia, Rostov Oblast, Don River                                    |
|                      | OR252991 | OR252290                           | MCorb134_2 |                                                                     |
|                      | OR252992 | OR252291                           | MCorb134_3 |                                                                     |
| <i>C. fluminalis</i> | OR252993 | OR252292 Var 1/<br>OR252293 Var 2* | MCorb135_1 | Russia, Republic of Dagestan, Shura-Ozen River                      |
|                      | OR252994 | OR252294 Var 1/<br>OR252295 Var 2* | MCorb135_2 |                                                                     |
| <i>C. fluminalis</i> | OR252995 | OR252296                           | MCorb136_1 | Russia, Republic of Dagestan, Malyy Sulak River                     |
|                      | OR252996 | OR252297 Var 1/<br>OR252298 Var 2* | MCorb136_2 |                                                                     |
|                      | OR252997 | OR252299                           | MCorb136_3 |                                                                     |
|                      | OR252998 | OR252300                           | MCorb136_4 |                                                                     |
| <i>C. fluminalis</i> | OR252999 | OR252301                           | MCorb137   | Russia, Republic of Dagestan, Sulak River                           |
| <i>C. fluminalis</i> | OR253000 | OR252302                           | MCorb138   | Russia, Republic of Dagestan, Sulak River                           |
| <i>C. fluminalis</i> | OR253001 | OR252303 Var 1/<br>OR252304 Var 2* | MCorb139   | Russia, Republic of Dagestan, Prisulakskiy Canal                    |
| <i>C. fluminalis</i> | OR253002 | OR252305 Var 1/<br>OR252306 Var 2* | MCorb140   | Russia, Republic of Dagestan, Samur                                 |
| <i>C. fluminalis</i> | OR253003 | OR252307 Var 1/<br>OR252308 Var 2* | MCorb141_1 | Russia, Stavropol Krai, Kura (Podkumok) River                       |
|                      | OR253004 | OR252309 Var 1/<br>OR252310 Var 2* | MCorb141_2 |                                                                     |
|                      | OR253005 | OR252311 Var 1/<br>OR252312 Var 2* | MCorb141_3 |                                                                     |

|                      |          |                                    |             |                                                              |
|----------------------|----------|------------------------------------|-------------|--------------------------------------------------------------|
|                      | OR253006 | OR252313 Var 1/<br>OR252314 Var 2* | MCorb141_4  |                                                              |
|                      | OR253007 | OR252315 Var 1/<br>OR252316 Var 2* | MCorb141_5  |                                                              |
|                      | OR253008 | OR252317                           | MCorb141_6  |                                                              |
|                      | OR253009 | OR252318 Var 1/<br>OR252319 Var 2* | MCorb141_7  |                                                              |
|                      | OR253010 | OR252320                           | MCorb141_8  |                                                              |
|                      | OR253011 | OR252321                           | MCorb141_9  |                                                              |
|                      | OR253012 | OR252322                           | MCorb141_10 |                                                              |
| <i>C. fluminalis</i> | OR253013 | n/a                                | MCorb143_1  | Myanmar, Bago River                                          |
| <i>C. fluminea</i>   | OR253014 | n/a                                | MCorb143_2  |                                                              |
| <i>C. fluminalis</i> | OR253015 | n/a                                | MCorb143_3  |                                                              |
| <i>C. fluminea</i>   | OR253016 | OR252323                           | MCorb147_1  | Russia, Kostroma Oblast, Kostroma Power Station cooling pond |
|                      | OR253017 | OR252324                           | MCorb147_2  |                                                              |
|                      | OR253018 | OR252325                           | MCorb147_3  |                                                              |
|                      | OR253019 | OR252326                           | MCorb147_4  |                                                              |
|                      | OR253020 | OR252327                           | MCorb147_5  |                                                              |
| <i>C. fluminea</i>   | OR253021 | n/a                                | MCorb148_1  | France, Canal du Midi, Toulouse                              |
|                      | OR253022 | n/a                                | MCorb148_2  |                                                              |
| <i>C. fluminalis</i> | OR253023 | n/a                                | MCorb149    | Turkey, Büyük Menderes River                                 |

\*Two copies of the 28S gene in a single individual. n/a – not available.
