# Supplementary material for: Genetic and Morphological Characterization of the Invasive Corbicula Lineages in European Russia
Source: MDPI journal article supplement (doi:10.3390/w15183226), 2023-09-11
Supplement: s1 [file s1]

Supporting Information, Table S1. Shell measurements of *Corbicula* clams from European Russia.

| Species                                                                      | SL (mm)      | SH (mm)      | SW (mm)     | Shell Elongation Index [SEI = SH/SL×100] | Shell Inflation Index [SIH = SW/SL×100] |
|------------------------------------------------------------------------------|--------------|--------------|-------------|------------------------------------------|-----------------------------------------|
| Kura River, Terek River basin, Stavropolsky Region                           |              |              |             |                                          |                                         |
| <i>C. fluminalis</i><br>(= <i>Corbicula</i><br>lineage FW17;<br>="Int" form) | 15.0         | 13.0         | 9.0         | 86.67                                    | 60.0                                    |
|                                                                              | 14.9         | 13.4         | 9           | 89.93                                    | 60.4                                    |
|                                                                              | 15.3         | 13.5         | 9.6         | 88.24                                    | 62.7                                    |
|                                                                              | 14.5         | 13           | 8.8         | 89.66                                    | 60.7                                    |
|                                                                              | 13           | 12           | 8           | 92.31                                    | 61.5                                    |
|                                                                              | 14           | 13           | 8.4         | 92.86                                    | 60.0                                    |
|                                                                              | 13.4         | 12           | 8.5         | 89.55                                    | 63.4                                    |
|                                                                              | 13.4         | 11.7         | 8           | 87.31                                    | 59.7                                    |
|                                                                              | 15           | 13           | 9           | 86.67                                    | 60.0                                    |
|                                                                              | 13.9         | 12.9         | 8.5         | 92.81                                    | 61.2                                    |
|                                                                              | 13.4         | 12.6         | 8.4         | 94.03                                    | 62.7                                    |
|                                                                              | 13.7         | 12.7         | 8.7         | 92.70                                    | 63.5                                    |
|                                                                              | 13           | 12.5         | 8           | 96.15                                    | 61.5                                    |
|                                                                              | 12.7         | 11.4         | 7.7         | 89.76                                    | 60.6                                    |
|                                                                              | 12.4         | 11           | 7.5         | 88.71                                    | 60.5                                    |
|                                                                              | 13.2         | 12.3         | 8           | 93.18                                    | 60.6                                    |
|                                                                              | 12.4         | 11           | 7           | 88.71                                    | 56.5                                    |
|                                                                              | 11.3         | 10           | 6.9         | 88.50                                    | 61.1                                    |
|                                                                              | 12           | 10.6         | 7.3         | 88.33                                    | 60.8                                    |
|                                                                              | 13.1         | 12.1         | 8.4         | 92.37                                    | 64.1                                    |
|                                                                              | 11.5         | 10.7         | 7           | 93.04                                    | 60.9                                    |
|                                                                              | 11.3         | 10           | 6.6         | 88.50                                    | 58.4                                    |
|                                                                              | 11.6         | 10.5         | 7           | 90.52                                    | 60.3                                    |
|                                                                              | 11.3         | 10           | 7           | 88.50                                    | 61.9                                    |
|                                                                              | 11.3         | 10.4         | 7           | 92.04                                    | 61.9                                    |
|                                                                              | 12           | 10.5         | 7.4         | 87.50                                    | 61.7                                    |
|                                                                              | 10           | 9            | 6           | 90.00                                    | 60.0                                    |
|                                                                              | 10.7         | 9.7          | 6.4         | 90.65                                    | 59.8                                    |
|                                                                              | 10.4         | 9.9          | 6           | 95.19                                    | 57.7                                    |
|                                                                              | 15.3         | 13.3         | 9           | 86.93                                    | 58.8                                    |
|                                                                              | 15.5         | 14           | 9.4         | 90.32                                    | 60.6                                    |
|                                                                              | 15.5         | 14           | 9.6         | 90.32                                    | 61.9                                    |
|                                                                              | 12.6         | 11.7         | 7.6         | 92.86                                    | 60.3                                    |
|                                                                              | 13.6         | 13.4         | 8.4         | 98.53                                    | 61.8                                    |
|                                                                              | 15.4         | 14.3         | 9.6         | 92.86                                    | 62.3                                    |
|                                                                              | 13           | 12.5         | 8.4         | 96.15                                    | 64.6                                    |
|                                                                              | 15           | 13           | 9.3         | 86.67                                    | 62.0                                    |
|                                                                              | 13.3         | 12.2         | 8           | 91.73                                    | 60.2                                    |
|                                                                              | 12.1         | 11.3         | 7.5         | 93.39                                    | 62.0                                    |
| <b>Mean</b>                                                                  | <b>13.10</b> | <b>11.90</b> | <b>8.00</b> | <b>90.88</b>                             | <b>61.00</b>                            |
| <b>SD</b>                                                                    | <b>1.54</b>  | <b>1.38</b>  | <b>1.00</b> | <b>2.92</b>                              | <b>1.64</b>                             |
| <b>Min</b>                                                                   | <b>10.0</b>  | <b>9.0</b>   | <b>6.0</b>  | <b>86.67</b>                             | <b>56.45</b>                            |
| <b>Max</b>                                                                   | <b>15.5</b>  | <b>14.3</b>  | <b>9.6</b>  | <b>98.53</b>                             | <b>64.62</b>                            |
| Terek River basin, Dagestan                                                  |              |              |             |                                          |                                         |
|                                                                              | 22.4         | 21.3         | 14.5        | 95.09                                    | 68.08                                   |
|                                                                              | 22.6         | 21           | 14.6        | 92.92                                    | 69.52                                   |
|                                                                              | 23.4         | 22           | 15.8        | 94.02                                    | 71.82                                   |

| Species                                                                    | SL (mm) | SH (mm) | SW (mm) | Shell Elongation Index [SEI = SH/SL×100] | Shell Inflation Index [SH = SW/SL×100] |
|----------------------------------------------------------------------------|---------|---------|---------|------------------------------------------|----------------------------------------|
| <i>C. fluminalis</i><br>(=Corbicula lineage FW17= <i>Corbicula</i> form S) | 20.4    | 19.5    | 13.4    | 95.59                                    | 68.72                                  |
|                                                                            | 18      | 17      | 12      | 94.44                                    | 70.59                                  |
|                                                                            | 14.5    | 13.9    | 10      | 95.86                                    | 71.94                                  |
|                                                                            | 13.9    | 13      | 10      | 93.53                                    | 76.92                                  |
|                                                                            | 13      | 11.7    | 9.2     | 90.00                                    | 78.63                                  |
|                                                                            | 10.5    | 9.6     | 7       | 91.43                                    | 72.92                                  |
|                                                                            | 12.2    | 11.5    | 9       | 94.26                                    | 78.26                                  |
|                                                                            | 10.9    | 10      | 7.3     | 91.74                                    | 73.00                                  |
|                                                                            | 11.4    | 10      | 7.4     | 87.72                                    | 74.00                                  |
|                                                                            | 10      | 9       | 6.7     | 90.00                                    | 74.44                                  |
|                                                                            | 10      | 9       | 6.7     | 90.00                                    | 74.44                                  |
|                                                                            | 13      | 12.5    | 9.5     | 96.15                                    | 76.00                                  |
|                                                                            | 17      | 16      | 13      | 94.12                                    | 81.25                                  |
|                                                                            | 16.6    | 17      | 12.7    | 102.41                                   | 74.71                                  |
|                                                                            | 18.4    | 18.5    | 12.9    | 100.54                                   | 69.73                                  |
|                                                                            | 17.4    | 17.3    | 12.5    | 99.43                                    | 72.25                                  |
|                                                                            | 15.7    | 15.6    | 11.4    | 99.36                                    | 73.08                                  |
|                                                                            | 18      | 18.4    | 12.7    | 102.22                                   | 69.02                                  |
|                                                                            | 16      | 15.5    | 11.6    | 96.88                                    | 74.84                                  |
|                                                                            | 14      | 14.5    | 10.4    | 103.57                                   | 71.72                                  |
|                                                                            | 17.7    | 17.6    | 13      | 99.44                                    | 73.86                                  |
|                                                                            | 17.4    | 17.2    | 12.5    | 98.85                                    | 72.67                                  |
|                                                                            | 16      | 16.3    | 11.7    | 101.88                                   | 71.78                                  |
|                                                                            | 16.2    | 16.4    | 12      | 101.23                                   | 73.17                                  |
|                                                                            | 16.1    | 16.8    | 12      | 104.35                                   | 71.43                                  |
|                                                                            | 17.6    | 18      | 13      | 102.27                                   | 72.22                                  |
|                                                                            | 14      | 14.3    | 10.4    | 102.14                                   | 72.73                                  |
|                                                                            | 16.8    | 15.9    | 12      | 94.64                                    | 75.47                                  |
|                                                                            | 16      | 16.7    | 12.5    | 104.38                                   | 74.85                                  |
|                                                                            | 19.5    | 19      | 13.9    | 97.44                                    | 73.16                                  |
|                                                                            | 16.7    | 18      | 13      | 107.78                                   | 72.22                                  |
|                                                                            | 17.1    | 17      | 12.9    | 99.42                                    | 75.88                                  |
|                                                                            | 16.3    | 15.5    | 11.3    | 95.09                                    | 72.90                                  |
|                                                                            | 15.3    | 14.9    | 11.4    | 97.39                                    | 76.51                                  |
|                                                                            | 15.6    | 15.8    | 11.6    | 101.28                                   | 73.42                                  |
|                                                                            | 15.4    | 15.5    | 11.2    | 100.65                                   | 72.26                                  |
|                                                                            | 16.7    | 16.7    | 12.5    | 100.00                                   | 74.85                                  |
|                                                                            | 16.4    | 15.5    | 12      | 94.51                                    | 77.42                                  |
|                                                                            | 16.9    | 16.8    | 12.4    | 99.41                                    | 73.81                                  |
|                                                                            | 15.7    | 15.6    | 11      | 99.36                                    | 70.51                                  |
|                                                                            | 15.5    | 16.1    | 12.1    | 103.87                                   | 75.16                                  |
|                                                                            | 15.9    | 15.8    | 12.4    | 99.37                                    | 78.48                                  |
|                                                                            | 16      | 15      | 11      | 93.75                                    | 73.33                                  |
|                                                                            | 15      | 15.2    | 11.8    | 101.33                                   | 77.63                                  |
|                                                                            | 15      | 14.5    | 10.8    | 96.67                                    | 74.48                                  |
|                                                                            | 13.9    | 14      | 10.5    | 100.72                                   | 75.00                                  |
|                                                                            | 14.7    | 14      | 11      | 95.24                                    | 78.57                                  |
|                                                                            | 13.4    | 13.7    | 10.6    | 102.24                                   | 77.37                                  |
|                                                                            | 13      | 14      | 10      | 107.69                                   | 71.43                                  |
|                                                                            | 14.7    | 15.6    | 11.9    | 106.12                                   | 76.28                                  |
|                                                                            | 15      | 15.1    | 11.6    | 100.67                                   | 76.82                                  |

| Species | SL (mm) | SH (mm) | SW (mm) | Shell Elongation Index [SEI = SH/SL×100] | Shell Inflation Index [SIH = SW/SL×100] |
|---------|---------|---------|---------|------------------------------------------|-----------------------------------------|
|         | 14.9    | 14.7    | 11.1    | 98.66                                    | 75.51                                   |
|         | 13.5    | 13.6    | 10.3    | 100.74                                   | 75.74                                   |
|         | 14      | 14.1    | 10.6    | 100.71                                   | 75.18                                   |
|         | 13      | 12.9    | 10.1    | 99.23                                    | 78.29                                   |
|         | 14      | 14.3    | 10.5    | 102.14                                   | 73.43                                   |
|         | 13.5    | 13.4    | 10      | 99.26                                    | 74.63                                   |
|         | 13      | 13.8    | 10.4    | 106.15                                   | 75.36                                   |
|         | 14.4    | 13.9    | 10.8    | 96.53                                    | 77.70                                   |
|         | 13.9    | 14      | 10.7    | 100.72                                   | 76.43                                   |
|         | 13.7    | 14.3    | 10.6    | 104.38                                   | 74.13                                   |
|         | 14      | 14.5    | 10.5    | 103.57                                   | 72.41                                   |
|         | 13.9    | 14.5    | 10.6    | 104.32                                   | 73.10                                   |
|         | 14.1    | 14.6    | 11      | 103.55                                   | 75.34                                   |
|         | 13      | 14      | 10.4    | 107.69                                   | 74.29                                   |
|         | 14.5    | 13.5    | 10.7    | 93.10                                    | 79.26                                   |
|         | 13.4    | 13.8    | 10.5    | 102.99                                   | 76.09                                   |
|         | 13      | 14      | 10.5    | 107.69                                   | 75.00                                   |
|         | 13.4    | 13.9    | 10.7    | 103.73                                   | 76.98                                   |
|         | 13.4    | 14.1    | 10.3    | 105.22                                   | 73.05                                   |
|         | 14.2    | 13.9    | 9.8     | 97.89                                    | 70.50                                   |
|         | 13.1    | 13.4    | 10.2    | 102.29                                   | 76.12                                   |
|         | 12.9    | 13      | 10      | 100.78                                   | 76.92                                   |
|         | 12      | 12.4    | 9.2     | 103.33                                   | 74.19                                   |
|         | 15      | 12.4    | 8.3     | 82.67                                    | 66.94                                   |
|         | 12.3    | 11.8    | 8.5     | 95.93                                    | 72.03                                   |
|         | 11.4    | 10.8    | 7.9     | 94.74                                    | 73.15                                   |
|         | 11.6    | 10.9    | 7.7     | 93.97                                    | 70.64                                   |
|         | 11.6    | 10.9    | 7.8     | 93.97                                    | 71.56                                   |
|         | 12      | 11.6    | 8.5     | 96.67                                    | 73.28                                   |
|         | 12.4    | 11.9    | 8.7     | 95.97                                    | 73.11                                   |
|         | 10.8    | 10.5    | 7.4     | 97.22                                    | 70.48                                   |
|         | 10.4    | 8.4     | 6       | 80.77                                    | 71.43                                   |
|         | 11.6    | 11.8    | 7.2     | 101.72                                   | 61.02                                   |
|         | 11.4    | 11      | 8       | 96.49                                    | 72.73                                   |
|         | 12      | 11.2    | 8.3     | 93.33                                    | 74.11                                   |
|         | 11.7    | 10.9    | 8.2     | 93.16                                    | 75.23                                   |
|         | 11.6    | 11.2    | 8       | 96.55                                    | 71.43                                   |
|         | 11      | 10.5    | 7.4     | 95.45                                    | 70.48                                   |
|         | 11.3    | 10.8    | 7.7     | 95.58                                    | 71.30                                   |
|         | 11.9    | 11.3    | 8       | 94.96                                    | 70.80                                   |
|         | 10.4    | 9.8     | 7.3     | 94.23                                    | 74.49                                   |
|         | 11      | 9.7     | 7.6     | 88.18                                    | 78.35                                   |
|         | 10      | 9.4     | 7       | 94.00                                    | 74.47                                   |
|         | 11.9    | 11.4    | 8       | 95.80                                    | 70.18                                   |
|         | 10.5    | 9.7     | 7.1     | 92.38                                    | 73.20                                   |
|         | 17      | 17.9    | 13.5    | 105.29                                   | 75.42                                   |
|         | 19.8    | 19.6    | 14.5    | 98.99                                    | 73.98                                   |
|         | 19      | 19.19   | 14.5    | 101.00                                   | 75.56                                   |
|         | 12.6    | 11.7    | 9       | 92.86                                    | 76.92                                   |
|         | 11.4    | 10.7    | 7.4     | 93.86                                    | 69.16                                   |
|         | 14.1    | 13.9    | 10      | 98.58                                    | 71.94                                   |

| Species                                                                                      | SL (mm)     | SH (mm)     | SW (mm)     | Shell Elongation Index [SEI = SH/SL×100] | Shell Inflation Index [SIH = SW/SL×100] |
|----------------------------------------------------------------------------------------------|-------------|-------------|-------------|------------------------------------------|-----------------------------------------|
|                                                                                              | 15.1        | 13.6        | 10          | 90.07                                    | 73.53                                   |
|                                                                                              | 15.9        | 14.5        | 10.4        | 91.19                                    | 71.72                                   |
|                                                                                              | 12.9        | 12.6        | 9           | 97.67                                    | 71.43                                   |
|                                                                                              | 15          | 14          | 10          | 93.33                                    | 71.43                                   |
|                                                                                              | 15.1        | 14.7        | 10          | 97.35                                    | 68.03                                   |
|                                                                                              | 11          | 10.9        | 7.5         | 99.09                                    | 68.81                                   |
|                                                                                              | 11.5        | 10.3        | 7.3         | 89.57                                    | 70.87                                   |
|                                                                                              | 11.3        | 10.5        | 7.6         | 92.92                                    | 72.38                                   |
|                                                                                              | 10.4        | 10.2        | 7.1         | 98.08                                    | 69.61                                   |
|                                                                                              | 12.2        | 10.9        | 7           | 89.34                                    | 64.22                                   |
|                                                                                              | 12          | 9.9         | 8           | 82.50                                    | 80.81                                   |
|                                                                                              | 10.9        | 10.8        | 7.3         | 99.08                                    | 67.59                                   |
|                                                                                              | 11          | 10.5        | 7.8         | 95.45                                    | 74.29                                   |
| <b>Mean</b>                                                                                  | <b>14.2</b> | <b>13.9</b> | <b>10.2</b> | <b>97.6</b>                              | <b>73.5</b>                             |
| <b>SD</b>                                                                                    | <b>2.8</b>  | <b>2.9</b>  | <b>2.2</b>  | <b>5.3</b>                               | <b>3.2</b>                              |
| <b>Min</b>                                                                                   | <b>10</b>   | <b>8.4</b>  | <b>6</b>    | <b>80.77</b>                             | <b>61.02</b>                            |
| <b>Max</b>                                                                                   | <b>23.4</b> | <b>22</b>   | <b>15.8</b> | <b>107.78</b>                            | <b>81.25</b>                            |
| Don River basin, Rostovskaya Oblast                                                          |             |             |             |                                          |                                         |
| <i>C. fluminea</i><br>(= <i>Corbicula</i><br>lineage FW5;<br>= <i>Corbicula</i><br>Rlc form) | 19.3        | 19          | 14          | 98.45                                    | 73.68                                   |
|                                                                                              | 10          | 9.5         | 7           | 95.00                                    | 73.68                                   |
|                                                                                              | 14.2        | 14          | 10          | 98.59                                    | 71.43                                   |
|                                                                                              | 10          | 9.4         | 7.1         | 94.00                                    | 75.53                                   |
|                                                                                              | 11          | 10.8        | 8           | 98.18                                    | 74.07                                   |
|                                                                                              | 10.7        | 9           | 7           | 84.11                                    | 77.78                                   |
|                                                                                              | 11.4        | 10          | 7.7         | 87.72                                    | 77.00                                   |
|                                                                                              | 10.3        | 9.1         | 7.3         | 88.35                                    | 80.22                                   |
|                                                                                              | 11.7        | 10          | 7           | 85.47                                    | 70.00                                   |
|                                                                                              | 11          | 9.9         | 7           | 90.00                                    | 70.71                                   |
|                                                                                              | 10.4        | 9.5         | 7           | 91.35                                    | 73.68                                   |
|                                                                                              | 11.5        | 10          | 8.1         | 86.96                                    | 81.00                                   |
|                                                                                              | 13.4        | 12          | 9           | 89.55                                    | 75.00                                   |
|                                                                                              | 16.2        | 15.9        | 11          | 98.15                                    | 69.18                                   |
|                                                                                              | 16.1        | 15          | 11.5        | 93.17                                    | 76.67                                   |
|                                                                                              | 12          | 10.5        | 8           | 87.50                                    | 76.19                                   |
|                                                                                              | 11.7        | 10.5        | 8.1         | 89.74                                    | 77.14                                   |
| <b>Mean</b>                                                                                  | <b>12.4</b> | <b>11.4</b> | <b>8.5</b>  | <b>91.5</b>                              | <b>74.9</b>                             |
| <b>SD</b>                                                                                    | <b>2.6</b>  | <b>2.9</b>  | <b>2.0</b>  | <b>4.8</b>                               | <b>3.4</b>                              |
| <b>Min</b>                                                                                   | <b>10</b>   | <b>9</b>    | <b>7</b>    | <b>84.11</b>                             | <b>69.18</b>                            |
| <b>Max</b>                                                                                   | <b>19.3</b> | <b>19</b>   | <b>14</b>   | <b>98.59</b>                             | <b>81</b>                               |
| Don River basin, Rostovskaya Oblast                                                          |             |             |             |                                          |                                         |
| <i>C. fluminea</i> (= <i>Corbicula</i> R form)*                                              | 26          | 24.7        | 16.8        | 95.00                                    | 68.02                                   |
|                                                                                              | 26          | 24          | 17.4        | 92.31                                    | 72.50                                   |
|                                                                                              | 15          | 15          | 12          | 100.00                                   | 80.00                                   |
|                                                                                              | 15          | 15.3        | 11          | 102.00                                   | 71.90                                   |
|                                                                                              | 12.5        | 12.6        | 9.8         | 100.80                                   | 77.78                                   |
|                                                                                              | 12.4        | 11.5        | 9           | 92.74                                    | 78.26                                   |
|                                                                                              | 13.5        | 13          | 10          | 96.30                                    | 76.92                                   |
|                                                                                              | 10.5        | 10          | 8           | 95.24                                    | 80.00                                   |
|                                                                                              | 22          | 21.5        | 14          | 97.73                                    | 65.12                                   |
|                                                                                              | 18          | 16          | 10.4        | 88.89                                    | 65.00                                   |
|                                                                                              | 16.5        | 15.8        | 11.2        | 95.76                                    | 70.89                                   |

| Species                                                            | SL (mm)     | SH (mm)     | SW (mm)     | Shell Elongation Index [SEI = SH/SL×100] | Shell Inflation Index [SI = SW/SL×100] |
|--------------------------------------------------------------------|-------------|-------------|-------------|------------------------------------------|----------------------------------------|
|                                                                    | 16          | 14.7        | 9.4         | 91.88                                    | 63.95                                  |
|                                                                    | 16          | 14.5        | 10.4        | 90.63                                    | 71.72                                  |
|                                                                    | 13.9        | 12          | 9.2         | 86.33                                    | 76.67                                  |
|                                                                    | 11.5        | 10          | 7.4         | 86.96                                    | 74.00                                  |
|                                                                    | 11          | 10          | 7.2         | 90.91                                    | 72.00                                  |
| <b>Mean</b>                                                        | <b>4.9</b>  | <b>4.7</b>  | <b>3.0</b>  | <b>4.7</b>                               | <b>5.3</b>                             |
| <b>SD</b>                                                          | <b>10.5</b> | <b>10</b>   | <b>7.2</b>  | <b>86.30</b>                             | <b>63.90</b>                           |
| <b>Min</b>                                                         | <b>26</b>   | <b>24.7</b> | <b>17.4</b> | <b>102</b>                               | <b>80</b>                              |
| <b>Max</b>                                                         | <b>4.9</b>  | <b>4.7</b>  | <b>3.0</b>  | <b>4.7</b>                               | <b>5.3</b>                             |
| Volga River basin, Kostromskaya Oblast                             |             |             |             |                                          |                                        |
| <i>C. fluminea</i><br>(=lineage FW5; =<br><i>Corbicula</i> R form) | 10.5        | 8.6         | 6.4         | 81.90                                    | 74.42                                  |
|                                                                    | 14.4        | 13.3        | 10          | 92.36                                    | 75.19                                  |
|                                                                    | 13.6        | 13          | 9.7         | 95.59                                    | 74.62                                  |
|                                                                    | 14.1        | 14          | 10.6        | 99.29                                    | 75.71                                  |
|                                                                    | 13.1        | 13.1        | 9.6         | 100.0                                    | 73.28                                  |
|                                                                    | 10.2        | 9.3         | 7           | 91.18                                    | 75.27                                  |
| <b>Mean</b>                                                        | <b>13.2</b> | <b>12.2</b> | <b>9.2</b>  | <b>92.3</b>                              | <b>75.0</b>                            |
| <b>SD</b>                                                          | <b>1.8</b>  | <b>2.5</b>  | <b>1.9</b>  | <b>7.5</b>                               | <b>0.6</b>                             |
| <b>Min</b>                                                         | <b>10.5</b> | <b>8.6</b>  | <b>6.4</b>  | <b>81.9</b>                              | <b>74.4</b>                            |
| <b>Max</b>                                                         | <b>14.4</b> | <b>14</b>   | <b>10.6</b> | <b>99.3</b>                              | <b>75.7</b>                            |

\*empty shells
