# Supplementary material for: Genetic and Morphological Characterization of the Invasive Corbicula Lineages in European Russia
Source: MDPI journal article supplement (doi:10.3390/w15183226), 2023-09-11
Supplement: s1 [file s1]

Supplementary Table S3. Information on additional COI sequences of *Corbicula* clams obtained from GenBank, including taxon, accession number, region, and data source

| Taxon                                  | NCBI's<br>GenBank acc.<br>no. | Locality     | Reference                   |
|----------------------------------------|-------------------------------|--------------|-----------------------------|
| <i>Corbicula</i> sp.                   | AY097306                      | France       | Pfenninger et al. (2002)    |
|                                        | AY097305                      |              |                             |
|                                        | AY097304                      |              |                             |
|                                        | AY097303                      |              |                             |
|                                        | AY097302                      |              |                             |
|                                        | AY097299                      | Israel       |                             |
|                                        | AY097298                      |              |                             |
|                                        | AY097297                      |              |                             |
|                                        | AY097296                      |              |                             |
|                                        | AY097295                      |              |                             |
|                                        | AY097286                      | Germany      |                             |
|                                        | AY097284                      |              |                             |
|                                        | AY097283                      |              |                             |
|                                        | AY097282                      |              |                             |
|                                        | AY097281                      |              |                             |
|                                        | AY097280                      |              |                             |
|                                        | AY097279                      |              |                             |
|                                        | AY097278                      |              |                             |
|                                        | AY097277                      |              |                             |
|                                        | AY097263                      | Germany      |                             |
| AY097262                               |                               |              |                             |
| <i>Corbicula fluminea</i>              | AF196269                      | Korea        | Siripattrawan et al. (2000) |
| <i>Corbicula leana</i>                 | AF196268                      | Japan        |                             |
| <i>Corbicula</i> sp.                   | AF457999                      | China        | Park and Kim (2003)         |
| <i>Corbicula</i> sp.                   | AF457995                      | China        |                             |
| <i>Corbicula</i> sp.                   | AF457994                      |              |                             |
| <i>Corbicula javanica</i>              | AF457993                      | Indonesia    |                             |
| <i>Corbicula</i> sp.                   | AF457991                      | Taiwan       |                             |
| <i>Corbicula</i> sp.                   | AF457990                      | China        |                             |
| <i>Corbicula</i> sp.                   | AF457989                      |              |                             |
| <i>Corbicula leana</i>                 | AY943243                      | USA          | Aguila et al. (unpubl.)     |
| North American <i>Corbicula</i> form C | AF519512                      | Argentina    | Lee et al. (2005)           |
| North American <i>Corbicula</i> form C | AF519508                      | Argentina    |                             |
| North American <i>Corbicula</i> form A | AF519495                      | USA          |                             |
| <i>Corbicula</i> form B                | AF519509                      | USA          |                             |
| <i>Corbicula leana</i>                 | KC211289                      | Japan        | Pigneur et al. (2014)       |
|                                        | KC211288                      |              |                             |
|                                        | KC211287                      |              |                             |
|                                        | KC211286                      |              |                             |
|                                        | KC211268                      |              |                             |
| <i>Corbicula fluminea</i>              | KC211285                      |              |                             |
|                                        | KC211284                      |              |                             |
|                                        | KC211283                      |              |                             |
|                                        | KC211282                      |              |                             |
|                                        | KC211281                      |              |                             |
|                                        | KC211267                      |              |                             |
| <i>Corbicula africana</i>              | KC211266                      | South Africa |                             |
|                                        | KC211265                      |              |                             |
|                                        | KC211263                      |              |                             |
| <i>Corbicula largillierti</i>          | KC211250                      | China        |                             |
| <i>Corbicula leana</i>                 | AB845591                      | Japan        | Yamada et al. (2014)        |
| <i>Corbicula fluminea</i>              | GQ401362                      | Hungary      | Rintelen et al. (unpubl.)   |
|                                        | GQ401361                      |              |                             |
| <i>Corbicula</i> cf. <i>fluminalis</i> | GQ401360                      |              |                             |

| Taxon                                  | NCBI's<br>GenBank acc.<br>no. | Locality  | Reference                      |             |                         |                         |
|----------------------------------------|-------------------------------|-----------|--------------------------------|-------------|-------------------------|-------------------------|
| <i>Corbicula fluminalis</i>            | GU721084                      | Europe    | Pigneur et al. (2011)          |             |                         |                         |
| <i>Corbicula</i> sp. LMP-2010          | GU721083                      | Europe    |                                |             |                         |                         |
| <i>Corbicula</i> sp. LMP-2010          | GU721082                      |           |                                |             |                         |                         |
| <i>Corbicula linduensis</i>            | DQ285579                      | Indonesia | Rintelen and Glaubrecht (2006) |             |                         |                         |
| <i>Corbicula javanica</i>              | AY275668                      | Indonesia | Glaubrecht et al. (2003)       |             |                         |                         |
| <i>Corbicula</i> cf. <i>fluminalis</i> | KX192335                      | Russia    | Bespalaya et al. (2018)        |             |                         |                         |
|                                        | KX192336                      |           |                                |             |                         |                         |
|                                        | KX192337                      |           |                                |             |                         |                         |
|                                        | KX192338                      |           |                                |             |                         |                         |
|                                        | KX192339                      |           |                                |             |                         |                         |
|                                        | KX192340                      |           |                                |             |                         |                         |
|                                        | KX192341                      |           |                                |             |                         |                         |
|                                        | KX192342                      |           |                                |             |                         |                         |
|                                        | KX192343                      |           |                                |             |                         |                         |
|                                        | KX192344                      |           |                                |             |                         |                         |
|                                        | KX192345                      |           |                                |             |                         |                         |
|                                        | KX192346                      |           |                                |             |                         |                         |
|                                        | KX192347                      |           |                                |             |                         |                         |
|                                        | KX192348                      |           |                                |             |                         |                         |
|                                        | KX192349                      |           |                                |             |                         |                         |
|                                        | KX192350                      |           |                                |             |                         |                         |
|                                        | KX192351                      |           |                                |             |                         |                         |
|                                        | KX192352                      |           |                                |             |                         |                         |
| <i>Corbicula fluminalis</i>            | MG759517                      | Myanmar   | Bespalaya et al. (2023)        |             |                         |                         |
|                                        | MG759518                      |           |                                |             |                         |                         |
|                                        | MG759520                      |           |                                |             |                         |                         |
| <i>Corbicula fluminea</i>              | KX192353                      |           |                                |             |                         |                         |
|                                        | KX192354                      |           |                                |             |                         |                         |
|                                        | MG759519                      |           |                                |             |                         |                         |
|                                        | MG759521                      |           |                                |             |                         |                         |
|                                        | MZ425215                      |           |                                |             |                         |                         |
|                                        | KY021080                      |           |                                |             |                         |                         |
| <i>Corbicula fluminea</i>              | MZ425215                      |           |                                | South Korea | Bespalaya et al. (2023) |                         |
|                                        | MZ425216                      |           |                                |             |                         |                         |
|                                        | MZ425217                      |           |                                |             |                         |                         |
|                                        | MZ425220                      |           |                                |             |                         |                         |
| <i>Corbicula leana</i>                 | MZ425218                      |           |                                |             |                         | Bespalaya et al. (2023) |
|                                        | MZ425219                      |           |                                |             |                         |                         |
|                                        | MZ425221                      |           |                                |             |                         |                         |
|                                        | MZ425222                      |           |                                |             |                         |                         |
|                                        | MZ425223                      |           |                                |             |                         |                         |
|                                        | MZ425224                      |           |                                |             |                         |                         |
|                                        | MZ425225                      |           |                                |             |                         |                         |
|                                        | MZ425226                      |           |                                |             |                         |                         |
|                                        | MZ425227                      |           |                                |             |                         |                         |
| <i>Corbicula fluminea</i>              | ON093197                      | Laos      | Bespalaya et al. (2023)        |             |                         |                         |
|                                        | ON093198                      |           |                                |             |                         |                         |
|                                        | ON093199                      |           |                                |             |                         |                         |
| <i>Corbicula fluminea</i>              | ON908402                      | Myanmar   | Kropotin et al (2023)          |             |                         |                         |
| <i>Corbicula leana</i>                 | ON908403                      |           |                                |             |                         |                         |
| <i>Corbicula fluminea</i>              | KM589107                      | Europe    | Penarrubia et al. (2015)       |             |                         |                         |
| <i>Corbicula fluminea</i>              | MK308235                      | USA       | Aguilar et.al 2018 (unpubl.)   |             |                         |                         |
| <i>Corbicula</i> sp. DTH13             | MG595702                      | China     | Li (unpubl.)                   |             |                         |                         |
| <i>Corbicula</i> sp. DTH12             | MG595701                      |           |                                |             |                         |                         |
| <i>Corbicula</i> sp. DTH11             | MG595700                      |           |                                |             |                         |                         |
| <i>Corbicula</i> sp. DTH10             | MG595699                      |           |                                |             |                         |                         |

| Taxon                         | NCBI's<br>GenBank acc.<br>no. | Locality    | Reference                  |              |
|-------------------------------|-------------------------------|-------------|----------------------------|--------------|
| <i>Corbicula fluminea</i>     | KT893373                      |             |                            |              |
|                               | KT893372                      |             |                            |              |
|                               | KT893368                      |             |                            |              |
|                               | KT893357                      |             |                            |              |
|                               | KT893348                      |             |                            |              |
|                               | KM659009                      |             |                            |              |
|                               | KM659006                      |             |                            |              |
|                               | KM659005                      |             |                            |              |
|                               | KM659003                      |             |                            |              |
|                               | KT893371                      |             |                            |              |
|                               | KT893370                      |             |                            |              |
|                               | KT893350                      |             |                            |              |
|                               | KT893345                      |             |                            |              |
|                               | KT893342                      |             |                            |              |
|                               | KT893369                      |             |                            |              |
|                               | KT893354                      |             |                            |              |
|                               | KT893374                      |             |                            |              |
|                               | KM659001                      |             |                            |              |
|                               | KM659007                      |             |                            |              |
|                               | KM659008                      |             |                            |              |
|                               | KM659010                      |             |                            |              |
| <i>Corbicula leana</i>        | MN746814                      | Indonesia   | Bespalaya et al. (2020)    |              |
| <i>Corbicula tobae</i>        | MN746819                      |             |                            |              |
|                               | MN746822                      |             |                            |              |
| <i>Corbicula fluminalis</i>   | MK071615                      | Azerbaijan  | Voroshilova et al. (2020)  |              |
| <i>Corbicula</i> sp. form C/S | OM912269                      | France      | Vastrade et al. (2022)     |              |
|                               | OM912268                      |             |                            |              |
|                               | OM912267                      |             |                            |              |
|                               | OM912266                      |             |                            |              |
|                               | OM912265                      |             |                            |              |
|                               | OM912264                      |             |                            |              |
|                               | OM912263                      |             |                            |              |
|                               | OM912262                      |             |                            |              |
|                               | OM912261                      |             |                            |              |
|                               | OM912073                      | Argentina   |                            |              |
|                               | OM912072                      |             |                            |              |
|                               | OM912071                      |             |                            |              |
|                               | OM912070                      |             |                            |              |
|                               |                               |             |                            |              |
|                               | <i>Corbicula africana</i>     | OM912303    |                            | South Africa |
| OM912302                      |                               |             |                            |              |
| OM912301                      |                               |             |                            |              |
| OM912300                      |                               |             |                            |              |
| OM912299                      |                               |             |                            |              |
| OM912298                      |                               |             |                            |              |
| OM912297                      |                               |             |                            |              |
| OM912296                      |                               |             |                            |              |
| OM912295                      |                               |             |                            |              |
| OM912294                      |                               |             |                            |              |
| OM912293                      |                               |             |                            |              |
| OM912292                      |                               |             |                            |              |
| OM912291                      |                               |             |                            |              |
| OM912290                      |                               |             |                            |              |
| OM912289                      |                               |             |                            |              |
| <i>Corbicula</i> sp.          | MH319866                      | Philippines | Stelbrink et al. (2018)    |              |
| <i>Corbicula fluminea</i>     | KC429132                      | USA         | Sharma et al. (2013)       |              |
| <i>Corbicula fluminea</i>     | AF120666                      | Europe      | Giribet and Wheeler (2002) |              |
| <i>Corbicula fluminea</i>     | KX231272                      | Italy       | Gomes et al. (unpubl.)     |              |

| Taxon                     | NCBI's<br>GenBank acc.<br>no. | Locality  | Reference               |
|---------------------------|-------------------------------|-----------|-------------------------|
| <i>Corbicula fluminea</i> | KX254564                      | China     | Tao et al. (unpubl.)    |
| <i>Corbicula fluminea</i> | KU318325                      | Singapore | Ng et al. (2016)        |
| <i>Corbicula leana</i>    | MF458661                      | France    | Corse et al. (2017)     |
| <i>Corbicula fluminea</i> | U47647                        | USA       | Baldwin et al 1996      |
| <i>Corbicula fluminea</i> | KT006544                      | Morocco   | Gomes et al. (2016)     |
|                           | KJ909515                      |           |                         |
| <i>Corbicula fluminea</i> | KU905760                      | USA       | Aguilar et al. (unpubl) |

### Supplementary References

1. Pfenninger, M.; Reinhardt, F.; Streit B. Evidence for cryptic hybridization between different evolutionary lineages of the invasive clam genus *Corbicula* (Veneroida, Bivalvia). *J. Evol. Biol.* **2002**, 15, 818–829.
2. Siripattawan, S.; Park, J-K.; Foighil, D.O. Two lineages of the introduced Asian freshwater clam *Corbicula* occur in North America. *J. Molluscan. Stud.* **2000**, 66, 423 – 429.
3. Park, J-K.; Kim, W. Two *Corbicula* (Corbiculidae: Bivalvia) mitochondrial lineages are widely distributed in Asian freshwater environment. *Mol. Phylogenet. Evol.* **2003**, 29, 529 – 539.
4. Lee, T.; Siripattawan, S.; Ituarte, C.F.; Foighil, D.O. Invasion of the clonal clams: *Corbicula* lineages in the New World. *Am. Malacol. Bull.* **2005**, 20, 113–122.
5. Pigneur, L.-M.; Etoundi, E.; Aldridge, D.C.; Marescaux, J.; Yasuda, N.; Van Doninck, K. Genetic uniformity and long-distance clonal dispersal in the invasive androgenetic *Corbicula* clams. *Mol. Ecol.* **2014**, 23, 5102–5116.
6. Yamada, M.; Ishibashi, R.; Toyoda, K.; Kawamura, K.; Komaru, A. Phylogeography of the Brackish Water Clam *Corbicula japonica* Around the Japanese Archipelago Inferred from Mitochondrial COII Gene Sequences. *Zool. Sci.* **2014**, 31, 168–179.
7. Pigneur, L.-M.; Marescaux, J.; Roland, K.; Etoundi, E.; Descy, J.-P.; Van Doninck, K. Phylogeny and androgenesis in the invasive *Corbicula* clams (Bivalvia, Corbiculidae) in Western-Europe. *BMC Evol. Biol.* **2011**, 11, 147.
8. von Rintelen, T.; Glaubrecht, M. Rapid evolution of sessility in an endemic species flock of the freshwater bivalve *Corbicula* from ancient lakes on Sulawesi, Indonesia. *Biol. Lett.* **2006**, 2, 73–77.
9. Glaubrecht, M.; von Rintelen, T.; Korniushev, A.V. Towards a systematic revision of brooding freshwater Corbiculidae in Southeast Asia (Bivalvia, Veneroida): On shell morphology, anatomy and molecular phylogenetics of endemic taxa from islands in Indonesia. *Malacologica* **2003**, 45, 1–40.
10. Bespalaya, Y.V.; Bolotov, I.N.; Aksenova, O.V.; Kondakov, A.V.; Gofarov, M.Y.; Laenko, E.; Sokolova, S.E.; Shevchenko, A.R.; Travina, O.V. Aliens are moving to the Arctic frontiers: An integrative approach reveals selective expansion of androgenic hybrid *Corbicula* lineages towards the North of Russia. *Biol. Invasions* **2018**, 20, 2227–2243.
11. Bespalaya, Y.V.; Kropotin, A.V.; Kondakov, A.V.; Aksenova, O.V.; Gofarov, M.Y.; Kim, S.K.; Lee, J.H.; Travina, O.V.; Vikhrev, I.V.; Vinarski, M.V.; Bolotov, I.N. A taxonomic reassessment of native and invasive species of *Corbicula* clams (Bivalvia:

- Cyrenidae) from the Russian Far East and Korea. *Zool. J. Linn. Soc.* **2023**, 197, 104 – 126.
12. Beshpalaya, Y.V.; Palatov, D.M.; Gofarov, M.Y.; Kondakov, A.V.; Kropotin, A.V.; Sousa, R.; Taskinen, J.; Inkhavilay, K.; Tanmuangpak, K.; Tumpeesuwan, S.; Vikhrev, I.V.; Bolotov, I.N. Associations of mayfly larvae with *Corbicula* clams. *Biol. J. Linn. Soc.* **2023**, 138, 169 – 193.
  13. Kropotin, A.V.; Beshpalaya, Y.V.; Kondakov, A.V.; Khrebtova, I.S.; Vikhrev, I.V.; Bolotov, I.N. Infection of *Corbicula* clams by trematode cercariae in Myanmar. *Ecol. Montenegrina* **2023**, 62, 1 – 11.
  14. Penarrubia, L.; Araguas, R.-M.; Pla, C.; Sanz, N.; Jordi, V.; Oriol, V. Identification of 246 microsatellites in the Asiatic clam (*Corbicula fluminea*). *Conserv. Genet. Resour.* **2015**, 7, 393 – 395.
  15. Beshpalaya, Y.V.; Aksenova, O.V.; Gofarov, M.Y.; Kondakov, A.V.; Kropotin, A.V.; Kononov, O.D.; Bolotov, I.N. Who inhabits the world's deepest crater lake? A taxonomic review of *Corbicula* (Bivalvia: Cyrenidae) clams from Lake Toba, North Sumatra, Indonesia. *J. Zool. Syst. Evol. Res.* **2021**, 59, 400–410.
  16. Voroshilova, I.S.; Pryanichnikova, E.G.; Prokin, A.A.; Sabitova, R.Z.; Karabanov, D.P.; Pavlov, D.D.; Kurina, E.M. Morphological and Genetic Traits of the First Invasive Population of the Asiatic Clam *Corbicula fluminea* (O.F. Müller, 1774) Naturalized in the Volga River Basin. *Russ. J. Biol. Invasions* **2021**, 12, 36 – 43.
  17. Vastrade, M.; Etoundi, E.; Bournonville, T.; Colinet, M.; Debortoli, N.; Hedtke, S.M.; Nicolas, E.; Pigneur, L.-M.; Virgo, J.; Flot, J.-F.; Marescaux, J.; Van Doninck, K. Substantial genetic mixing among sexual and androgenetic lineages within the clam genus *Corbicula*. *Peer Comm. J. Evol. Biol.* **2022**, 2, e73.
  18. Stelbrink, B.; Rintelen, T.; Albrecht, C.; Clewing, Naga, P. Forgotten for decades: Lake Lanao and the genetic assessment of its mollusc diversity. *Hydrobiol.* **2018**, 843, 31–49.
  19. Sharma, P.P.; Zardus, J.D.; Boyle, E.E.; Gonzalez, V.L.; Jennings, R.M.; McIntyre, E.; Wheeler, W.C.; Etter, R.J.; Giribet, G. Into the deep: a phylogenetic approach to the bivalve subclass Protobranchia. *Mol. Phylogenet. Evol.* **2013**, 69, 188 – 204.
  20. Giribet, G.; Wheeler, W.C. On bivalve phylogeny: a high-level analysis of the Bivalvia (Mollusca) based on combined morphology and DNA sequence data. *Invertebr. Biol.* **2005**, 121, 271 – 324.
  21. Ng, T.H.; Tan, S.K.; Wong, W.H.; Meier, R.; Chan, S.-Y.; Tan, H.H. Molluscs for Sale: Assessment of Freshwater Gastropods and Bivalves in the Ornamental Pet Trade. *PLoS ONE*. **2016**, 11, e0161130.
  22. Corse, E.; Megléc, E.; Archambaud, G.; Ardisson, M.; Martin J.-F.; Tougaard, C.; Chappaz, R.; Dubut, V. A from-benchtop-to-desktop workflow for validating HTS data and for taxonomic identification in diet metabarcoding studies. *Mol Ecol Resour.* **2017**, 17, 146 – 159.
  23. Baldwin, B.S.; Black, M.; Sanjurjo, O.; Gustafson, R.; Lutz, R.A.; Vrijenhoek, R.C. A diagnostic molecular marker for zebra mussels (*Dreissena polymorpha*) and potentially co-occurring bivalves: mitochondrial COI. *Mol. Mar. biol. biotech.* **1996**, 5, 9 – 14.
  24. Gomes, C.; Sousa, R.; Mendes, T.; Borges, R.; Vilares, P.; Vasconcelos, V.; Guilhermino, L.; Antunes, A. Low genetic diversity and high invasion success of *Corbicula fluminea* (Bivalvia, Corbiculidae) (Müller, 1774) in Portugal. *PLoS ONE* **2016**, 11, e0158108.
